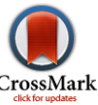

# Complete Mitochondrial Genome of *Eruca sativa* Mill. (Garden Rocket)

Yankun Wang<sup>1,9</sup>, Pu Chu<sup>1,9</sup>, Qing Yang<sup>1</sup>, Shengxin Chang<sup>1</sup>, Jianmei Chen<sup>1</sup>, Maolong Hu<sup>2</sup>, Rongzhan Guan<sup>1,3\*</sup>

**1** State Key Laboratory of Crop Genetics and Germplasm Enhancement, Nanjing Agricultural University, Nanjing, Jiangsu, China, **2** Institute of Economic Crop, Jiangsu Academy of Agricultural Sciences, Nanjing, Jiangsu, China, **3** Nanjing Agricultural University, Jiangsu Collaborative Innovation Center for Modern Crop Production, Nanjing, Jiangsu, China

## Abstract

*Eruca sativa* (Cruciferae family) is an ancient crop of great economic and agronomic importance. Here, the complete mitochondrial genome of *Eruca sativa* was sequenced and annotated. The circular molecule is 247 696 bp long, with a G+C content of 45.07%, containing 33 protein-coding genes, three rRNA genes, and 18 tRNA genes. The *Eruca sativa* mitochondrial genome may be divided into six master circles and four subgenomic molecules via three pairwise large repeats, resulting in a more dynamic structure of the *Eruca sativa* mtDNA compared with other cruciferous mitotypes. Comparison with the *Brassica napus* MtDNA revealed that most of the genes with known function are conserved between these two mitotypes except for the *ccmFN2* and *rrn18* genes, and 27 point mutations were scattered in the 14 protein-coding genes. Evolutionary relationships analysis suggested that *Eruca sativa* is more closely related to the *Brassica* species and to *Raphanus sativus* than to *Arabidopsis thaliana*.

**Citation:** Wang Y, Chu P, Yang Q, Chang S, Chen J, et al. (2014) Complete Mitochondrial Genome of *Eruca sativa* Mill. (Garden Rocket). PLoS ONE 9(8): e105748. doi:10.1371/journal.pone.0105748

**Editor:** Weijun Zhou, Zhejiang University, China

**Received:** June 18, 2014; **Accepted:** July 26, 2014; **Published:** August 26, 2014

**Copyright:** © 2014 Wang et al. This is an open-access article distributed under the terms of the Creative Commons Attribution License, which permits unrestricted use, distribution, and reproduction in any medium, provided the original author and source are credited.

**Data Availability:** The authors confirm that all data underlying the findings are fully available without restriction. The mitochondrial genome sequences of *Eruca sativa* are available from the GenBank database (accession number KF442616). Other relevant data are within the paper and its Supporting Information files.

**Funding:** This work was supported by the National Natural Science Foundation of China (No. 31270386, 31301352 and 31101174), the National Key Technology R & D Program (No. 2010BAD01B02 and 2011BAD13B09) in China, the Open Research Fund of State Key Laboratory of State Key Laboratory of Crop Genetics and Germplasm Enhancement (ZW2011006), the Priority Academic Program Development of Jiangsu Higher Education Institutions (PAPD), the Special Fund for Independent innovation of Agricultural Science and Technology in Jiangsu province (Nos. CX (11) 1026), and the Science and Technology Support Program of Jiangsu Province (BE2012327). The funders had no role in study design, data collection and analysis, decision to publish, or preparation of the manuscript.

**Competing Interests:** The authors have declared that no competing interests exist.

\* Email: guanrz@njau.edu.cn

<sup>9</sup> These authors contributed equally to this work.

## Introduction

Mitochondria supply energy in the form of ATP through oxidative phosphorylation in almost all eukaryotic cells [1]. In comparison to their counterparts in animals and fungi, plant mitochondrial (mt) genomes have unique features, such as large and dramatic variations in size [2], dynamic structure [3], extremely low rate of point mutations [4] and incorporation of foreign DNA [5]. The largest known mitochondrial genomes are those of seed plants, with sizes ranging from 208 kb for *Brassica hirta* [6] to over 11.3 Mb for *Silene conica* [4]. The dramatic variation may occur within closely related species [7]. Active recombination via repeated sequences appear to be responsible for the dynamic nature and multipartite organization of the mt genome in all angiosperms investigated [8], which may produce significantly different gene orders even among close relatives [9].

Mitochondria play an important role in plant growth and development. Genomic rearrangements involving substoichiometric shifting (SSS), a consequence of intermediate repeat DNA exchange [10], is often accompanied by changes in the plant's phenotype. SSS activity in plant mitochondria has been reported to be associated with cytoplasmic male sterility [11], nitrate sensing and GA-mediated pathways for growth and flowering

[12]. Plant mitochondria have also been associated with stress responses [13] and regulation of programmed cell death [14]. Therefore, determining mitochondrial genomes is important for determining specific metabolic activities of plants [15].

*Eruca sativa* Mill. or *Eruca vesicaria* subsp. *sativa* (Miller) (Garden rocket), a member of the Cruciferae family, has several desirable agronomic traits, such as resistance to salt, drought, white rust and aphids [16–18]. Introducing these beneficial genes of *E. sativa* into economically important cultivated species will promote crop improvement [19,20]. Crosses of *E. sativa* with other species of the family Cruciferae, including *B. rapa*, *B. juncea*, and *B. oleracea*, have been reported [20].

To date, several mt genomes from the Cruciferae family have been sequenced, including *Arabidopsis thaliana* (*tha*) [21], *Raphanus sativus* (*sat*) [22] and five species from the *Brassica* genus, i.e., *B. napus* (*pol*, *nap*), *B. rapa* (*cam*), *B. oleracea* (*ole*), *B. juncea* (*jun*), and *B. carinata* (*car*) [23–25]. In this study, we reported the complete mitochondrial genome sequences of *E. sativa* and provide a comparison with other sequenced cruciferous mt genomes. This research will help to characterize the *E. sativa* crop and further our understanding of the evolution of mitochondrial genomes within the Cruciferae family.

## Materials and Methods

### Mitochondrial DNA isolation and sequencing

A commercial cultivar of *E. sativa* was used in this study. Mitochondrial DNA was isolated from 7-day-old etiolated seedlings according to Chen's methods (Chen et al., 2011), and stored at  $-80^{\circ}\text{C}$  until use. Genome sequencing was performed using the GS-FLX platform (Roche, Branford, CT, USA). The reads were assembled into contigs using Newbler v.2.6. Sanger sequencing of PCR products was used to join the contigs to form the complete genome.

### Sequence data analysis

The NCBI database (<http://www.ncbi.nlm.nih.gov/>) was searched for mitochondrial sequences annotation, using previously annotated mitochondrial genes from angiosperms as query sequences. The tRNAs were identified using the tRNA scan-SE software (<http://lowelab.ucsc.edu/tRNAscan-SE/>). Putative open reading frames (ORFs) with a minimum size of 100 codons were

predicted and annotated using ORF-Finder (<http://www.ncbi.nlm.nih.gov/gorf/gorf.html>). The circular map was drawn using OGDRAW v1.2 (<http://ogdraw.mpimp-golm.mpg.de/>). Repeats analysis was performed as previously described [25].

### Comparing mitochondrial genomes and evolutionary analysis

The *E. sativa* mitochondrial genome sequence presented here was compared with eight other reported Cruciferae mitotypes: *B. rapa* (GenBank: NC\_016125), *B. oleracea* (GenBank: NC\_016118), *B. juncea* (GenBank: NC\_016123), *B. carinata* (GenBank: NC\_016120), *B. napus* (GenBank: NC\_008285), *B. napus* cultivar Polima (EMBL: FR715249), *R. sativus* (GenBank: JQ083668) and *A. thaliana* (GenBank: NC\_001284), using NCBI-blastn. For comparison, the exons of 32 protein coding genes (*atp1*, *atp4*, *atp6*, *atp8*, *atp9*, *ccmB*, *ccmC*, *ccmFc*, *ccmFN1*, *ccmFN2*, *cob*, *cox1*, *cox2-1*, *cox3*, *matR*, *nad1*, *nad2*, *nad3*, *nad4*, *nad4L*, *nad5*, *nad6*, *nad7*, *nad9*, *rpl2*, *rpl5*, *rpl16*, *rps3*, *rps4*, *rps7*, *rps12*, *tatC*), which were shared by these nine species, were

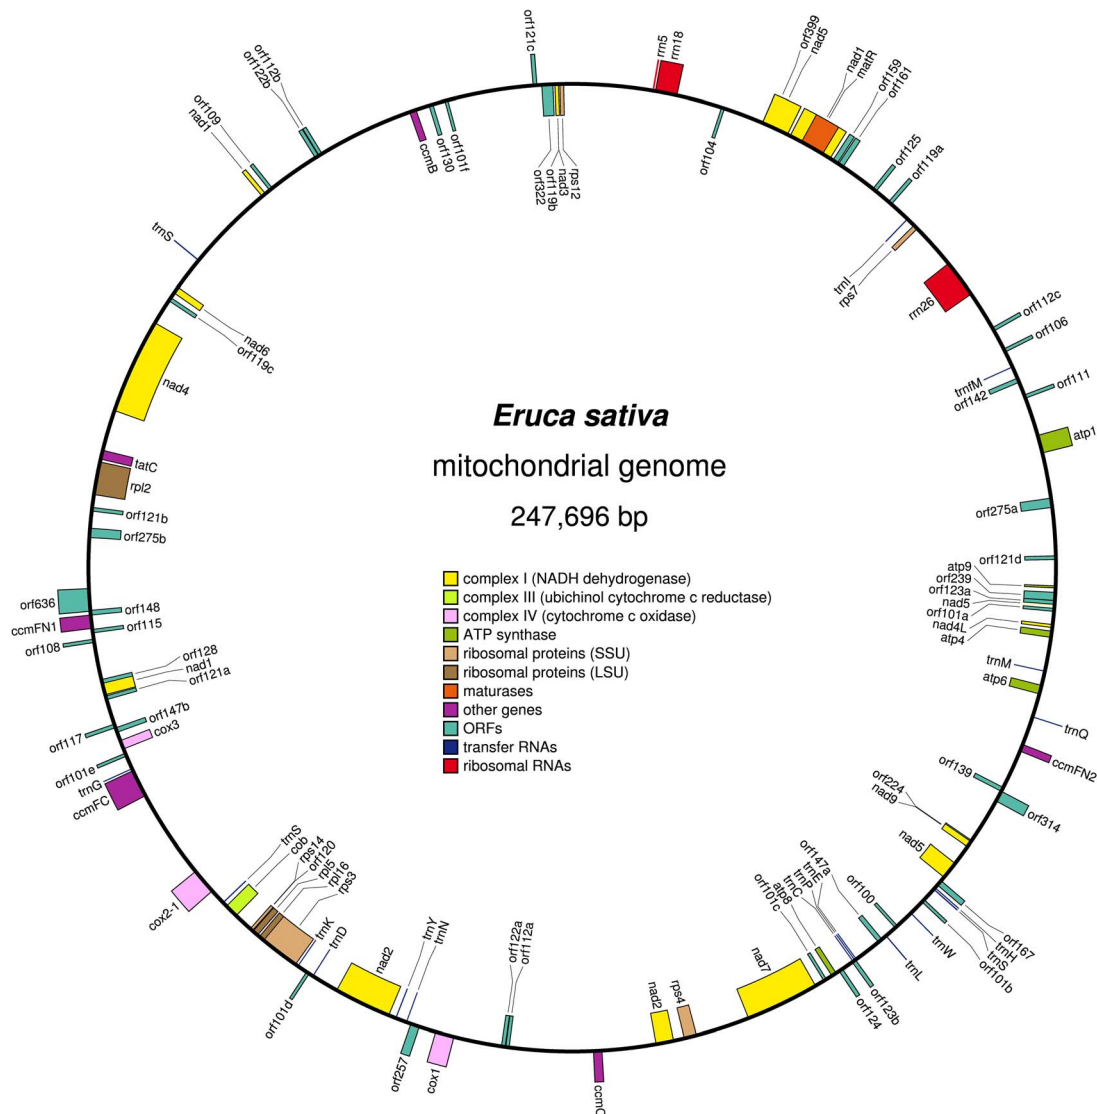

**Figure 1. Mitochondrial genome map of *Eruca sativa*.** Features on the clockwise- and counter-clockwise-transcribed strands are drawn on the inside and outside of the circle, respectively. The figure was drawn using OGDRAW v1.2. doi:10.1371/journal.pone.0105748.g001

extracted and sequentially joined together. A neighbor-joining tree [26] was constructed with MEGA 5, using the Kumar method [27]. The number of bootstrap replications was set as 1000 [28].

## Results

### The mitochondrial genome of *E. sativa*

The mitochondrial genome of *E. sativa* was assembled as a single circular molecule of 247 696 bp (Figure 1, deposited in GenBank under the accession KF442616). The overall GC content of the mtDNA is 45.07%, which is comparable to those of other mtDNAs of *Cruciferae*. The largest part of the *E. sativa* mtDNA comprises the non-coding sequences (85.14%), which is slightly smaller than the average non-coding sequences content ( $89.4 \pm 3.1\%$ ) in other reported angiosperm mitochondrial genomes [29]. Genes account for 26.27% of the genome (65 070 bp in total length), 56.61% of which represent exons (36 837 bp) and 43.39% represent introns (28 233 bp).

### Gene content and ORFs

Using BLAST and tRNA scan-SE, 54 genes were identified, including 33 protein coding genes, three rRNA genes (5S, 18S and 26S rRNAs) and 18 transfer RNA genes (Figure 1, Table 1). The 33 protein coding genes (PCGs) were in the range of 225 bp (*atp9*) to 7 979 bp (*nad4*), including 18 genes for components of the electron transport chain and ATP synthase: nine subunits of complex I (*nad1-7*, *4L*, *9*), one subunit of complex III (*cob*), three subunits of complex IV (*cox1-3*) and five subunits of complex V (*atp1*, *4*, *6*, *8*, *9*). In addition, there are five genes for cytochrome c biogenesis (*ccmB*, *ccmC*, *ccmFN1/ccmFN2* and *ccmFC*), eight genes for ribosomal proteins (*rpl2*, *5*, *16* and *rps3*, *4*, *7*, *12*, *14*), two genes for maturase (*matR*) and one gene for other functions (*tatC*). The total length of the 33 PCGs of *E. sativa* mtDNA is 58 569 bp, accounting for 23.64% of its total mtDNA genome length, which is lower than that of the *Brassica* and *R. sativus* mitotypes. Nine genes had an exon–intron structure. All exons of *ccmFC* (exons a, b), *nad2* (a-e), *cox2* (a, b), *nad4* (a-d), *nad7* (a-e), *rps3* (a, b) and *rpl2* (a, b) were cis-spliced, whereas some exons of *nad1* and *nad5* were trans-spliced as follows: *nad1a/nad1b-e*; *nad5a*, *b*, *d*, *e/nad5c* (the slash indicating trans-spliced exons). ATG is the

most commonly used initiation codon for mitochondrial PCGs in *E. sativa*, except for *nad1* (start with ACG), *matR* (start with AGA) and *tatC* (start with ATT), as predicted by previous studies (Handa, 2003). Ten genes (*nad4*, *cob*, *ccmC*, *ccmFN1/ccmFN2*, *cox3*, *atp8*, *atp9*, *rpl2* and *rps12*) are predicted to terminate with TGA and six (*atp1*, *nad7*, *rps3*, *rps14*, *matR* and *tatC*) with TAG; other PCGs use TAA as their termination codon.

18 tRNA sequences (1 383 bp) were found in *E. sativa* mtDNA (Table 2), in the range of 71–88 bp in length. The A+T content of the tRNA genes is 48.81%, which is lower than the overall A+T composition of the mtDNA. Among these genes, tRNAs for 15 amino acids, including duplication of the methionine (Met) and triplication of the serine (Ser), are encoded. The genome lacks tRNAs for the amino acids alanine (Ala), valine (Val), phenylalanine (Phe), threonine (Thr) and arginine (Arg). To enable gene expression for protein synthesis in mitochondria, the missing tRNAs may be supplied by either the chloroplast or nuclear genomes [30].

Using ORF-Finder and BLAST searching, 50 ORFs longer than 100 codons were identified in the *E. sativa* mitochondrial genome. Among the 50 ORFs, only the *orf112*, *orf121*, *orf122*, and *orf275* have two copies. All others are single-copy ORFs. Most of the ORFs are between 300 and 500 bp in length, except for 10 ORFs that are longer than 500 bp, including the 1 200 bp *orf399* and the 1 911 bp *orf636*.

### Subgenomic circles mediated by large repeats

Large repeats (>1 Kb) have been identified in most of the seed plants analyzed, except for white mustard (*Brassica hirta*) (Palmer and Herbo, 1987). The repeats in the *E. sativa* mitochondrial genome were analyzed. Three pairs of large repeats were identified, accounting for 13.48% of the genome. The large repeats were designated as R1, R2 and R3 (Table 3). R1 (10 320 bp) has a pair of large repeats in the opposite orientation, while R2 (4 864 bp) and R3 (1 513 bp) have a pair of large repeats in the same orientation. Large repeat R1 contains two ORFs, *orf112* and *orf122*, while R2 and R3 contain *orf275* and the *orf121*, respectively. No known protein coding gene was found in these large repeats.

**Table 1.** Gene content of the mitochondrial DNA of *Eruca sativa*.

| Product group           | Gene        |               |              |                 |                         |             |
|-------------------------|-------------|---------------|--------------|-----------------|-------------------------|-------------|
| Complex I               | <i>nad1</i> | <i>nad2</i>   | <i>nad3</i>  | <i>nad4</i>     | <i>nad4L</i>            |             |
|                         | <i>nad5</i> | <i>nad6</i>   | <i>nad7</i>  | <i>nad9</i>     |                         |             |
| Complex III             | <i>cob</i>  |               |              |                 |                         |             |
| Complex IV              | <i>cox1</i> | <i>cox2-1</i> | <i>cox3</i>  |                 |                         |             |
| Complex V               | <i>atp1</i> | <i>atp4</i>   | <i>atp6</i>  | <i>atp8</i>     | <i>atp9</i>             |             |
| Ribosome large subunit  | <i>rpl2</i> | <i>rpl5</i>   |              | <i>rpl16</i>    |                         |             |
| Ribosome small subunit  | <i>rps3</i> | <i>rps4</i>   | <i>rps7</i>  | <i>rps12</i>    | <i>rps14</i>            |             |
| Cytochrome c biogenesis | <i>ccmB</i> | <i>ccmC</i>   | <i>ccmFC</i> | <i>ccmFN1</i>   | <i>ccmFN2</i>           |             |
| Intron maturase         | <i>matR</i> |               |              |                 |                         |             |
| Protein translocase     | <i>tatC</i> |               |              |                 |                         |             |
| rRNA genes              | <i>rrn5</i> | <i>rrn18</i>  | <i>rrn26</i> |                 |                         |             |
| tRNA genes              | <i>trnN</i> | <i>trnD</i>   | <i>trnC</i>  | <i>trnE</i>     | <i>trnQ</i>             | <i>trnG</i> |
|                         | <i>trnH</i> | <i>trnI</i>   | <i>trnK</i>  | <i>trnM</i>     | <i>trnI<sup>M</sup></i> | <i>trnP</i> |
|                         | <i>trnW</i> | <i>trnY</i>   | <i>trnL</i>  | <i>trnS(3×)</i> |                         |             |

doi:10.1371/journal.pone.0105748.t001

**Table 2.** Recognition of anticodons by tRNA genes found in the mtDNA of *Eruca sativa*.

| Name                 | Type | Anticodon | Length(bp) | Orientation |
|----------------------|------|-----------|------------|-------------|
| chloroplast origin   |      |           |            |             |
| <i>trnD</i>          | Asp  | GTC       | 74         | inverted    |
| <i>trnH</i>          | His  | GTG       | 74         | direct      |
| <i>trnL</i>          | Leu  | CAA       | 81         | direct      |
| <i>trnM</i>          | Met  | CAT       | 73         | direct      |
| <i>trnN</i>          | Asn  | GTT       | 72         | inverted    |
| <i>trnW</i>          | Trp  | CCA       | 74         | direct      |
| <i>trnS</i>          | Ser  | GGA       | 87         | inverted    |
| mitochondrial origin |      |           |            |             |
| <i>trnfM</i>         | Met  | CAT       | 74         | inverted    |
| <i>trnG</i>          | Gly  | GCC       | 72         | direct      |
| <i>trnI</i>          | Ile  | CAU       | 81         | inverted    |
| <i>trnK</i>          | Lys  | TTT       | 73         | inverted    |
| <i>trnQ</i>          | Gln  | TTG       | 72         | direct      |
| <i>trnS</i>          | Ser  | TGA       | 87         | direct      |
| <i>trnS</i>          | Ser  | GCT       | 88         | direct      |
| <i>trnY</i>          | Tyr  | GTA       | 83         | inverted    |
| <i>trnC</i>          | Cys  | GCA       | 71         | inverted    |
| <i>trnE</i>          | Glu  | TTC       | 72         | inverted    |
| <i>trnP</i>          | Pro  | TGG       | 75         | inverted    |

doi:10.1371/journal.pone.0105748.t002

Large repeats have been implicated in mediating high frequency, reciprocal DNA exchange that can result in subdivision of the genome into a multipartite configuration [31]. The formation of the multipartite structure of the *E. sativa* mitochondrial genome was predicted based on the assumptions of intramolecular homologous recombination (Figure 2). Six isometric master circular (MC) genomic structures of the same length (including MC1 shown in Figure 1) could be produced by intramolecular recombination between different repeat pairs. In addition, MC molecule 1 and 6 may generate four subgenomic circles, including two small circles of 129 447 bp (SC1) and 118 249 bp (SC2) via the pairwise large repeat R2, and another two small circles of 132 016 bp (SC3) and 115 680 bp (SC4) mediated by the pairwise large repeat R3. MC3 may produce SC1 and SC2, and MC4 may produce SC3 and SC4, mediated by the pairwise large repeat R1.

### Sequence comparison between *E. sativa* and *B. napus* mtDNAs

We compared the sequences of the mtDNAs from *E. sativa* and *B. napus*. Most of the protein coding and RNA genes were

conserved in length, except *ccmFN2* and *rrn18*. The 5' portion of the coding region of *ccmFN2* in *E. sativa* mtDNA was quite different (Figure S1) and a 25-bp deletion in *rrn18* was found in *E. sativa* mtDNA (Figure S2) compared with that in *B. napus*. The *E. sativa* mitotype is devoid of *cox2-2*, compared with that of *B. napus*. 27 single nucleotide polymorphisms (SNPs) were detected in 14 genes when compared with *B. napus* (Table 4). Thirteen synonymous substitutions were found in *atp6*, *ccmB*, *cob*, *cox1*, *nad2*, *nad6*, *rpl2*, *rps3*, and *rps4*. Fourteen nonsynonymous mutants were found in 11 genes, including an S to N (199aa) switch in *atp1*, a V to I (18aa) and an H to F (51aa) switch in *atp6*, a P to L (107aa) switch in *ccmB*, an R to K (113aa) switch in *ccmFC*, an H to Y (285aa) switch in *cob*, a P to L (112aa) switch in *cox1*, an S to L (126aa) and an S to N (438aa) switch in *matR*, a C to R (72aa) switch in *nad2*, an S to L (29aa) switch in *rpl2*, an L to P (172aa) switch in *rpl5*, and an M to I (50aa) switch in *rps7*. Of these 27 SNPs, most were transitions and only three were transversion (G→T in *nad2*, T→A in *cox1*, and T→A in *atp6*). All tRNAs in the *B. napus* mitochondrial genome were detected in *E. sativa* mtDNA. However, the ORFs were quite different between these two mitotypes.

**Table 3.** Large repeats in the mtDNA of *Eruca sativa*.

| No. | Type <sup>a</sup> | Size(bp) | Copy-1      | Copy-2        | Difference between copies | Identity |
|-----|-------------------|----------|-------------|---------------|---------------------------|----------|
| R1  | IR                | 10320    | 77495-87814 | 176149-186468 | identical                 | 100%     |
| R2  | DR                | 4864     | 4083-8946   | 119763-124626 | 2 bp mismatch             | 99.95%   |
| R3  | DR                | 1513     | 1-1513      | 118250-119762 | identical                 | 100%     |

<sup>a</sup>DR and IR: direct and reverse repeats, respectively.

doi:10.1371/journal.pone.0105748.t003

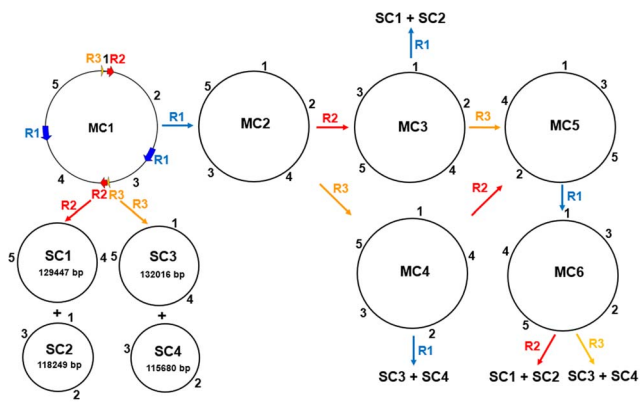

**Figure 2. The multipartite mitochondrial genome structure of *Eruca sativa*.** Schematic diagrams showing six master circles and four subgenomic circles. The three repeat pairs are shown in different colors. MC and SC mean master and subgenomic circles, respectively. Numbers outside circles indicate segments separated by repeat pairs.  
doi:10.1371/journal.pone.0105748.g002

### Evolutionary relationships of the cruciferous mitotypes

To further illustrate the evolution of mitochondrial genomes within the Cruciferae family, the *E. sativa* mtDNA and other reported Cruciferous mtDNAs were compared using BLASTN [32]. *E. sativa* mtDNA was used as the reference sequence and similar regions in two or more mtDNA sequences were aligned. The alignable *E. sativa* sequence (93%) was 81% identical to that of *R. sativus* mtDNA. The sequence identity shared by the mtDNA of *E. sativa* and *Brassica* was more than 83%, with a coverage in the range of 83–85%. Only 63% of the *E. sativa* mtDNA matched those of *Arabidopsis thaliana*, with an identity of more than 68%, and the longest fragment was only 8.0 kb. This result suggested that the evolutionary relationship of mitochondrial genomes among *E. sativa*, the *Brassicaceae* and *R. sativus* is closer than that between *E. sativa* and *A. thaliana*.

In support of this hypothesis, a dot matrix analysis showed that the lengths of syntenic regions between *E. sativa* and *A. thaliana* are shorter than those between *E. sativa* and *Brassica* or *R. sativus*. Additionally, the distribution of syntenic regions between the mtDNAs of *E. sativa* and *A. thaliana* is more dispersed, and the identity is lower, than that between *E. sativa* and the *Brassicaceae* mitotypes (Figure 3). Moreover, the phylogenetic relationships among the Cruciferae family (Figure 4) were inferred using the neighbor-joining method and 23 conserved genes among the

**Table 4. SNP in protein-coding genes of mtDNA between *Eruca sativa* and *Brassica napus*.**

| Gene               | Position from the start codon | nucleotide variation |                 | Position from the first amino acid | amino acid change |
|--------------------|-------------------------------|----------------------|-----------------|------------------------------------|-------------------|
|                    |                               | <i>B.napus</i>       | <i>E.sativa</i> |                                    |                   |
| <i>atp1</i>        | 596                           | AGT                  | AAT             | 199                                | S→N               |
| <i>atp6</i>        | 7                             | GAG                  | AAG             | 260                                | Synonymous        |
|                    | 559                           | GAA                  | AAA             | 76                                 | Synonymous        |
|                    | 635                           | ATG                  | AAA             | 51                                 | H→F               |
|                    | 735                           | GAC                  | GAT             | 18                                 | V→I               |
| <i>ccmB</i>        | 235                           | CCC                  | TCC             | 129                                | Synonymous        |
|                    | 303                           | AAG                  | AAA             | 107                                | P→L               |
|                    | 577                           | GGG                  | AGG             | 15                                 | Synonymous        |
| <i>ccmFC exonB</i> | 337                           | GCG                  | ACG             | 113                                | R→K               |
| <i>cob</i>         | 330                           | ATG                  | ATA             | 285                                | H→Y               |
|                    | 409                           | TCC                  | CCC             | 258                                | Synonymous        |
| <i>cox1</i>        | 335                           | CCC                  | CTC             | 112                                | P→L               |
|                    | 702                           | TAC                  | TAT             | 234                                | Synonymous        |
|                    | 1466                          | CCT                  | CCA             | 489                                | Synonymous        |
| <i>matR</i>        | 377                           | CGG                  | TGG             | 126                                | S→L               |
|                    | 1313                          | AGC                  | AAC             | 438                                | S→N               |
|                    | 1566                          | GGG                  | GGA             | 522                                | Synonymous        |
| <i>nad2 exonB</i>  | 179                           | CAA                  | CGA             | 72                                 | C→R               |
| <i>nad2 exonD</i>  | 500                           | GAT                  | TAT             | 25                                 | Synonymous        |
| <i>nad6</i>        | 388                           | CGC                  | TGC             | 77                                 | Synonymous        |
| <i>rpl2 exonB</i>  | 47                            | CGA                  | CAA             | 29                                 | S→L               |
| <i>rpl5</i>        | 44                            | CAG                  | CGG             | 172                                | L→P               |
| <i>rps3 exonB</i>  | 685                           | GGT                  | AGT             | 302                                | Synonymous        |
|                    | 823                           | CTT                  | TTT             | 256                                | Synonymous        |
| <i>rps4</i>        | 391                           | CTT                  | TTT             | 233                                | Synonymous        |
| <i>rps7</i>        | 298                           | CAT                  | TAT             | 50                                 | M→I               |

doi:10.1371/journal.pone.0105748.t004

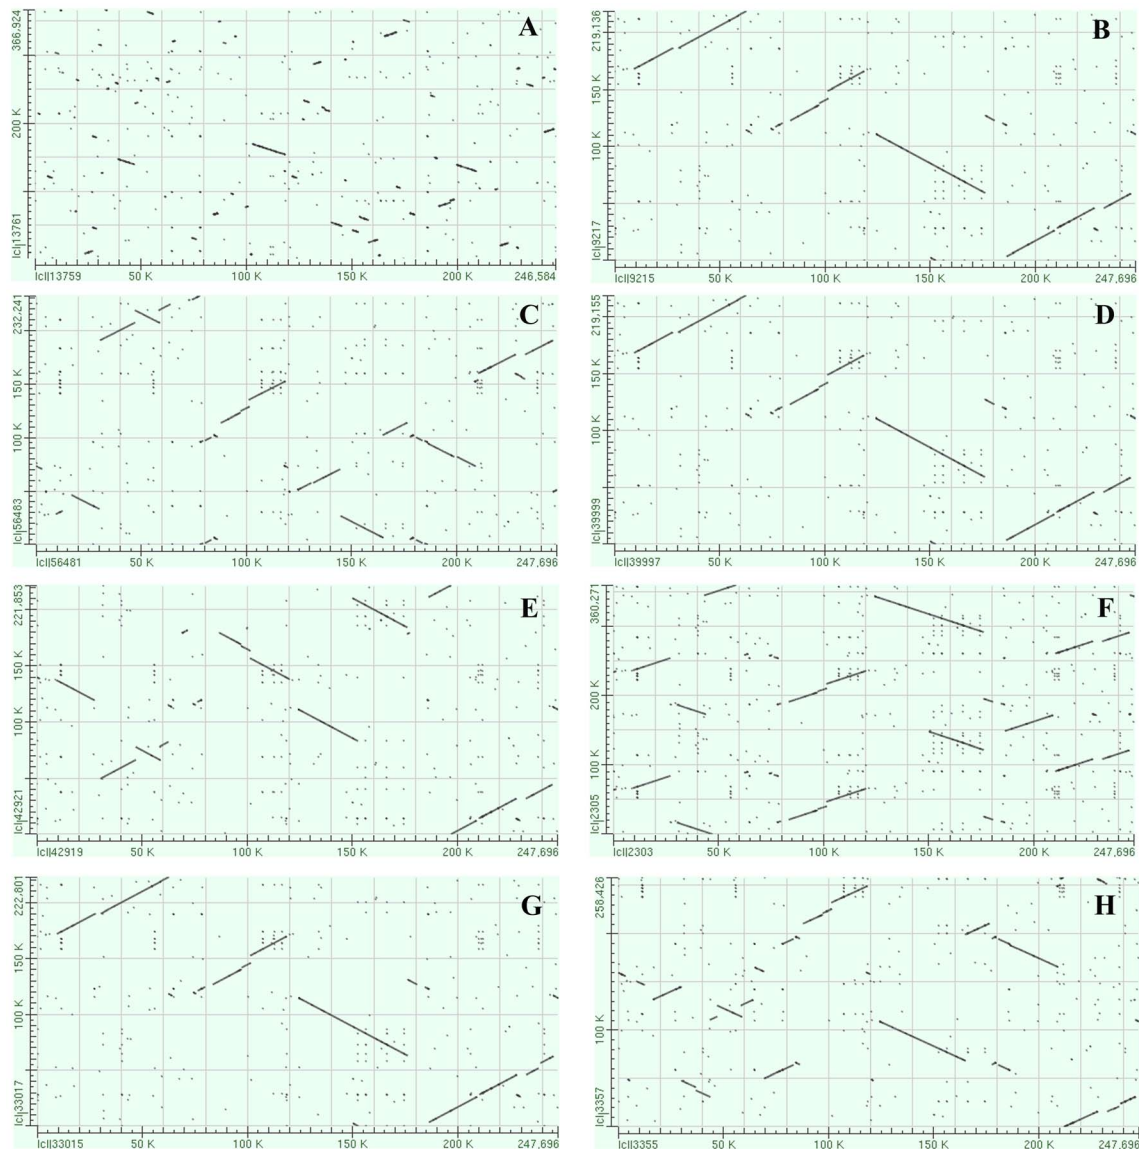

**Figure 3. Dot matrix alignments of the *Eruca sativa* (x-axis) and other known cruciferous mtDNAs (y-axis).** (A) *Arabidopsis thaliana* (*tha*), (B) *B. rapa* (*cam*), (C) *B. carinata* (*car*), (D) *B. juncea* (*jun*), (E) *B. napus* (*nap*), (F) *B. oleracea* (*ole*), (G) *B. napus* (*pol*), (G) *Raphanus sativus* (*sat*). doi:10.1371/journal.pone.0105748.g003

reported Cruciferae mitotypes. The results are mainly consistent with previous reports based on mitochondrial genome analysis [22] and strongly support the conclusion that *E. sativa* is more closely related to the *Brassica* species and *R. sativus* than to *A. thaliana*.

## Discussion

The *Cruciferae* family is one of the largest dicot families of the flowering plant kingdom and includes several vegetable and oilseed crops, as well as several model species of great scientific, economic and agronomic importance [33]. Annotations for mitochondrial genomes from closely related species would improve the understanding of molecular evolution and phylogenetic relationships [34] in the *Cruciferae* family. *E. sativa*, a member of the *Cruciferae* family, is a conventional crop consumed as food and fodder. The economic potential of *E. sativa* lies in various other aspects, including the protein sources for edible

purposes, a potential source of industrial oil, an effective biological control of crop pests and traditional pharmacopoeia for various purposes [35]. To better understand this important crop, the mitochondrial genome of *E. sativa* was sequenced and annotated.

*Cruciferae* mitochondrial genomes are generally small (208–367 kb) compared with other seed plants. The *E. sativa* mt genome (248 kb) is larger than most *Brassica* mitotypes, but smaller than that of *B. oleracea* (360 kb) and *A. thaliana* (367 kb). Comparison of the *E. sativa* mtDNA with the *B. napus* mtDNA revealed that the *cox2-2* gene was absent from the *E. sativa* mt genome. This gene was also absent from the genomes of *B. oleracea*, *B. carinata*, and *Ogura-cms-cybrid* (*oguC*) rapeseed mitotypes [25,36]. A distinguishing feature of *Cruciferae* mitochondrial genomes is that the *ccmFN* genes are divided into two reading frames (*ccmFN1* and *ccmFN2*) [23]. The translation of *ccmFN2* has been confirmed in *A. thaliana* mitochondria, which demonstrated that *ccmFN2* was not a pseudo gene, although it lacks a classical ATG initiation codon [37]. Sequence alignments

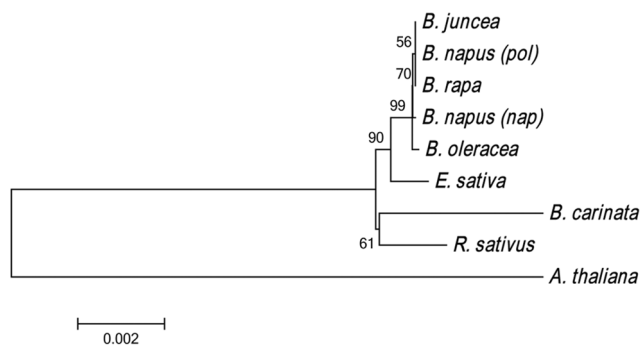

**Figure 4. Phylogeny of nine cruciferous mitotypes.** The phylogenetic tree was inferred using the neighbor-joining method based on the exons of 32 protein coding genes. The evolutionary distances were computed using the Kumar method, and the branch lengths are in units of synonymous substitutions per synonymous site. Evolutionary analyses were conducted in MEGA5. doi:10.1371/journal.pone.0105748.g004

of *ccmFN2* from reported Cruciferae mtDNAs showed that the first 45 bp of the putative *ccmFN2* gene in *E. sativa* mt genome is quite different from the *ccmFN2* gene in *Brassica* and *A. thaliana* mitotypes (Figure S1), suggesting that this non-conserved region may not be critical for gene function. However, the tryptophan-rich WWD domain in *ccmFN2*, which is responsible for heme binding [38], is conserved among these mitotypes.

The 5S and 18S rRNA genes in *E. sativa* mtDNA are closely linked, as they are in other plants, and the 26S rRNA gene is separated from the 18S and 5S by 26 459 bp. To elucidate the evolutionary origins of mitochondria, the ribosomal RNA genes have been extensively examined [39]. Sequence analysis of the *rrn18* gene from wheat, maize and soybean showed highly similarity between the plant mitochondrial *rrn18* genes and the eubacterial 16S rRNA, suggesting that there is a much slower rate of sequence change in plant mitochondria compared with their animal counterparts [40]. We compared the *rrn18* among the reported Cruciferae mitotypes and found a 25-bp deletion in *rrn18* in *E. sativa* mtDNA (Figure S2) compared with that in *Brassica* mitotypes. We also noticed a 46-bp deletion in *rrn18* within the same region of the *Brassica* mitotypes when compared with that in *A. thaliana* mtDNA. However, the overall nucleotide identities of the *rrn18* gene sequences were markedly high, from 89.50% between *E. sativa* and *A. thaliana* to 93.92% between *E. sativa* and the *Brassica* family. The nucleotide identity of the *rrn18* gene between *E. sativa* and *R. sativus* was 93.86% (Figure S2). This result is consistent with the results of the phylogenetic analysis based on 32 protein coding genes (Figure 4), which suggested that *E. sativa* is closer to *Brassica* and *R. sativus* than to *A. thaliana*.

18 tRNA genes were identified in *E. sativa* mtDNA, accounting for only 0.56% of the mitochondrial genome. Among them, six seem to be chloroplast derived, which exhibit high sequence identity (>99%) to their chloroplast counterparts. The chloroplast-derived *trnH-GTG*, *trnM-CAT*, *trnS-GGA*, *trnW-CCA*, *trnD-GUC*, and *trnN-GTT* genes, which are frequently found in mitochondrial genomes of angiosperms [15], were identified in the *E. sativa* mtDNA. An additional chloroplast-originating tRNA gene (*trnL-CAA*), which is found in the *R. sativus* and *Brassica* mitotypes [22], was also identified in *E. sativa* mitochondrial genome. This result indicated that mt tRNA genes are frequently transferred from chloroplast genomes during the evolution of angiosperms. However, another two gene (*trnP-GGG* and *trnQ-UUG*)

transfer events reported in dicots [41,42] were not found in *E. sativa*.

Genes with known functions are relatively conserved among the Cruciferae mitotypes, especially for the protein coding genes. However, the mitochondrial genomes structural differences are remarkable among the Cruciferae family. Multipartite structures of mtDNA mediated by large repeats have been commonly observed in plant species [43]. Direct electron-microscopic evidence of the coexistence of multipartite molecules in the plant mitochondrial genome has been found in tobacco [44]. The large repeat, RB, which is 2,427 bp in length and has been identified in most of the reported *Brassica* (except the *oguC* rapeseed) mitotypes, was not found in the *E. sativa* mtDNA. Instead, three pairwise large repeats were identified. Large repeat R1 in *E. sativa* mtDNA showed significantly high sequence similarity to the 6 580-bp large repeat R in *B. carinata* mitochondria (Figure S3). The 1 513-bp large repeat R3 showed 99% identity to the corresponding segments of the large repeat R2 in *B. oleracea* mitochondrial genome. Only 2% and 23% of R1 in *E. sativa* mtDNA showed high similarity (>83%) with the large repeats in *A. thaliana* and *R. sativus* mtDNA, respectively. The tripartite structure of the mitochondrial genome, including one master circle and two smaller subgenomic circles, has been reported in *Brassica* species (except the *ole* mitotype) and *R. sativus* [22,25,36]. The predicted multipartite structure of the mitochondrial genome in *E. sativa* is more complex than other Cruciferae species because of the three pairwise large repeats, including six master circles and four smaller subgenomic circles.

## Conclusions

In this study, we reported the complete mitochondrial genome sequence of *E. sativa*, a member of the Cruciferae family. The *E. sativa* mtDNA is 247 696 bp and harbors 33 known protein coding genes, three rRNAs (5 S, 18 S, and 26 S rRNAs) and 18 tRNAs. In addition, the *cox2-2* gene is absent, the *ccmFN2* and *rrn18* genes have different lengths and 27 SNPs are involved in 14 protein coding genes in comparison with *B. napus* mtDNA. Reorganization of the genome may have occurred via three pairs of large repeats, resulting in a more dynamic structure of the *E. sativa* mtDNA compared with other cruciferous mitotypes. This may produce six master circles and four smaller subgenomic circles. The evolutionary relationships analysis among reported Cruciferous mitotypes revealed that the mitochondrial genome of *E. sativa* is divergent from *A. thaliana*, but closely related to those of *Brassica* and *R. sativus*. This study will improve our understanding of the *E. sativa* crop and the evolution of mitochondrial genomes within the Cruciferae family.

## Supporting Information

**Figure S1 Sequence alignments of *ccmFN2* from reported Cruciferae mtDNAs.** The highly and partly conserved amino acids are shaded black or grey respectively. The black block diagram indicates the un-conserved region of *ccmFN2* in *E. sativa* mtDNAs compared to other reported Cruciferae mtDNAs. (TIF)

**Figure S2 Sequence alignments of *rrn18* from reported Cruciferae mtDNAs.** The highly and partly conserved amino acids are shaded black or grey respectively. The black block diagram indicates the deletion region of *rrn18* in *E. sativa* mtDNAs compared to other reported Cruciferae mtDNAs. (TIF)

**Figure S3 Alignment of the large repeats in *Eruca sativa* mtDNA with the large 6.6 kb repeats in *car*.** The alignment was made using Mauve. Blocks of the same color denote homologous regions; the *B. carinata* blocks above or below the middle line represent direct or inverted, respectively, compared with *E. sativa*. The extent to which a block is filled indicates the similarity of the syntenic region. (TIF)

## References

- Mower JP, Sloan DB, Alverson AJ (2012) Plant mitochondrial genome diversity: the genomics revolution. In: Jonathan FW, Johann G, Jaroslav D, Ilija JL, editors. Plant Genome Diversity Volume 1. Vienna: Springer. pp. 123–144.
- Kubo T, Newton KJ (2008) Angiosperm mitochondrial genomes and mutations. *Mitochondrion* 8: 5–14.
- Ogihara Y, Yamazaki Y, Murai K, Kanno A, Terachi T, et al. (2005) Structural dynamics of cereal mitochondrial genomes as revealed by complete nucleotide sequencing of the wheat mitochondrial genome. *Nucleic Acids Res* 33: 6235–6250.
- Sloan DB, Alverson AJ, Chuckalovcak JP, Wu M, McCauley DE, et al. (2012) Rapid evolution of enormous, multichromosomal genomes in flowering plant mitochondria with exceptionally high mutation rates. *PLoS Biol* 10: e1001241.
- Tanaka Y, Tsuda M, Yasumoto K, Yamagishi H, Terachi T (2012) A complete mitochondrial genome sequence of Ogura-type male-sterile cytoplasm and its comparative analysis with that of normal cytoplasm in radish (*Raphanus sativus* L.). *BMC genomics* 13: 352.
- Palmer JD, Herbo LA (1987) Unicircular structure of the *Brassica hirta* mitochondrial genome. *Curr Genet* 11: 565–570.
- Alverson AJ, Wei X, Rice DW, Stern DB, Barry K, et al. (2010) Insights into the evolution of mitochondrial genome size from complete sequences of *Citrullus lanatus* and *Cucurbita pepo* (Cucurbitaceae). *Mol Biol Evol* 27: 1436–1448.
- Woloszynska M (2010) Heteroplasmy and stoichiometric complexity of plant mitochondrial genomes—though this be madness, yet there's method in't. *J Exp Bot* 61: 657–671.
- Palmer JD, Herbon LA (1988) Plant mitochondrial DNA evolved rapidly in structure, but slowly in sequence. *J Mol Evol* 28: 87–97.
- Arrieta-Montiel MP, Shedje V, Davila J, Christensen AC, Mackenzie SA (2009) Diversity of the *Arabidopsis* mitochondrial genome occurs via nuclear-controlled recombination activity. *Genetics* 183: 1261–1268.
- Sandhu APS, Abdelnoor RV, Mackenzie SA (2007) Transgenic induction of mitochondrial rearrangements for cytoplasmic male sterility in crop plants. *Proc. Natl. Acad. Sci. U S A* 104: 1766–1770.
- Pellny TK, Van Aken O, Dutilleul C, Wolff T, Groten K, et al. (2008) Mitochondrial respiratory pathways modulate nitrate sensing and nitrogen-dependent regulation of plant architecture in *Nicotiana glauca*. *Plant J* 54: 976–992.
- Huang S, Millar AH, Taylor NL (2011) The plant mitochondrial proteome composition and stress response: conservation and divergence between monocots and dicots. In: Frank K, editors. *Plant Mitochondria*: Springer. pp. 207–239.
- Diamond M, McCabe PF (2011) Mitochondrial regulation of plant programmed cell death. *Plant Mitochondria*. New York: Springer. pp. 439–465.
- Chang S, Wang Y, Lu J, Gai J, Li J, et al. (2013) The mitochondrial genome of soybean reveals complex genome structures and gene evolution at intercellular and phylogenetic levels. *PLoS One* 8: e56502.
- Tsunoda S, Hinata K, Gomez-Campo C (1980) *Eco-physiology of wild and cultivated forms in Brassica and allied genera*. Brassica crops and wild allies Biology and breeding. Tokyo: Japan Scientific Societies Press. 109–120 p.
- Lakshmi Kumaran M, Negi MS (1994) Structural analysis of two length variants of the rDNA intergenic spacer from *Eruca sativa*. *Plant Mol Biol* 24: 915–927.
- Ashraf M (1994) Organic substances responsible for salt tolerance in *Eruca sativa*. *Biol Plantarum* 36: 255–259.
- Fahleson J, Lagercrantz U, Mouras A, Glimelius K (1997) Characterization of somatic hybrids between *Brassica napus* and *Eruca sativa* using species-specific repetitive sequences and genomic in situ hybridization. *Plant Sci* 123: 133–142.
- Sastry ED (2003) Taramira (*Eruca sativa*) and its improvement—A Review. Agricultural reviews- Agricultural Research Communications Centre India 24: 235–249.
- Unsel M, Marienfeld JR, Brandt P, Brennicke A (1997) The mitochondrial genome of *Arabidopsis thaliana* contains 57 genes in 366,924 nucleotides. *Nat Genet* 15: 57–61.
- Chang S, Chen J, Wang Y, Gu B, He J, et al. (2013) A Mitochondrial Genome of *Raphanus sativus* and Gene Evolution of Cruciferous Mitochondrial Types. *J Genet Genomics* 40:117–126.
- Handa H (2003) The complete nucleotide sequence and RNA editing content of the mitochondrial genome of rapeseed (*Brassica napus* L.): comparative analysis

## Author Contributions

Conceived and designed the experiments: RG. Performed the experiments: YW. Analyzed the data: YW PC SC QY. Contributed reagents/materials/analysis tools: JC MH RG. Contributed to the writing of the manuscript: PC.

- of the mitochondrial genomes of rapeseed and *Arabidopsis thaliana*. *Nucleic Acids Res* 31: 5907–5916.
- Chen J, Guan R, Chang S, Du T, Zhang H, et al. (2011) Substoichiometrically different mitotypes coexist in mitochondrial genomes of *Brassica napus* L. *PLoS One* 6: e17662.
- Chang S, Yang T, Du T, Huang Y, Chen J, et al. (2011) Mitochondrial genome sequencing helps show the evolutionary mechanism of mitochondrial genome formation in Brassica. *BMC genomics* 12: 497.
- Saitou N, Nei M (1987) The neighbor-joining method: a new method for reconstructing phylogenetic trees. *Mol Biol Evol* 4: 406–425.
- Kumar S, Nei M, Dudley J, Tamura K (2008) MEGA: a biologist-centric software for evolutionary analysis of DNA and protein sequences. *Brief Bioinform* 9: 299–306.
- Felsenstein J (1985) Confidence limits on phylogenies: an approach using the bootstrap. *Evolution* 39: 783–791.
- Chaw SM, Shih AC, Wang D, Wu YW, Liu SM, et al. (2008) The mitochondrial genome of the gymnosperm *Cycas taitungensis* contains a novel family of short interspersed elements, Bpu sequences, and abundant RNA editing sites. *Mol Biol Evol* 25: 603–615.
- Fang Y, Wu H, Zhang T, Yang M, Yin Y, et al. (2012) A complete sequence and transcriptomic analyses of date palm (*Phoenix dactylifera* L.) mitochondrial genome. *PLoS One* 7: e37164.
- Arrieta-Montiel MP, Mackenzie SA (2011) Plant mitochondrial genomes and recombination. In: Frank K, editors. *Plant mitochondria*. New York: Springer. pp. 65–82.
- Zhang Z, Schwartz S, Wagner L, Miller W (2000) A greedy algorithm for aligning DNA sequences. *J Comput Biol* 7: 203–214.
- Anjum NA, Gill SS, Ahmad I, Pacheco M, Duarte AC, et al. (2012) The Plant Family Brassicaceae: An Introduction. In: Anjum N.A., Ahmad I, Pereira ME, Duarte AC, Umar S, Khan NA, editors. *The Plant Family Brassicaceae*. Berlin: Springer. pp. 1–33.
- Yuan ML, Wei DD, Wang BJ, Dou W, Wang JJ (2010) The complete mitochondrial genome of the citrus red mite *Panonychus citri* (Acari: Tetranychidae): high genome rearrangement and extremely truncated tRNAs. *BMC genomics* 11: 597.
- Slater SM (2013) Biotechnology of *Eruca Sativa* Mill. In: Shri MJ, Shourya DG., editors. *Biotechnology of Neglected and Underutilized Crops*. Netherlands: Springer. pp. 203–216.
- Wang J, Jiang J, Li X, Li A, Zhang Y, et al. (2012) Complete sequence of heterogenous-composition mitochondrial genome (*Brassica napus*) and its exogenous source. *BMC genomics* 13: 675.
- Rayapuram N, Hagenmuller J, Grienerberger JM, Bonnard G, Giegé P (2008) The three mitochondrial encoded CcmF proteins form a complex that interacts with CCMH and c-type apocytochromes in *Arabidopsis*. *J Biol Chem* 283: 25200–25208.
- Goldman BS, Beck DL, Monika EM, Kranz RG (1998) Transmembrane heme delivery systems. *Proc. Natl. Acad. Sci. U S A* 95: 5003–5008.
- Gray MW (1982) Mitochondrial genome diversity and the evolution of mitochondrial DNA. *Can J Biochem* 60: 157–171.
- Grabau EA (1985) Nucleotide sequence of the soybean mitochondrial 18S rRNA gene: evidence for a slow rate of divergence in the plant mitochondrial genome. *Plant Mol Biol* 5: 119–124.
- Zhang T, Fang Y, Wang X, Deng X, Zhang X, et al. (2012) The complete chloroplast and mitochondrial genome sequences of *Boea hygrometrica*: insights into the evolution of plant organellar genomes. *PLoS One* 7: e30531.
- Goremykin VV, Lockhart PJ, Viola R, Velasco R (2012) The mitochondrial genome of *Malus domestica* and the import-driven hypothesis of mitochondrial genome expansion in seed plants. *Plant J* 71: 615–626.
- Park JY, Lee Y-P, Lee J, Choi B-S, Kim S, et al. (2013) Complete mitochondrial genome sequence and identification of a candidate gene responsible for cytoplasmic male sterility in radish (*Raphanus sativus* L.) containing DCGMS cytoplasm. *Theor Appl Genet* 126: 1763–1774.
- Sugiyama Y, Watae Y, Nagase M, Makita N, Yagura S, et al. (2005) The complete nucleotide sequence and multipartite organization of the tobacco mitochondrial genome: comparative analysis of mitochondrial genomes in higher plants. *Mol Genet Genomics* 272: 603–615.
